# Supplementary material for: Generation of an expandable intermediate mesoderm restricted progenitor cell line from human pluripotent stem cells
Source: PubMed Central journal article supplement (PMC4631902; doi:10.7554/elife.08413), 2015-11-10
Supplement: elife08413s001.pdf [file elife08413s001.pdf]

**Supplementary file 1A: 244 MP and ME genes**

|           |         |           |           |         |          |            |
|-----------|---------|-----------|-----------|---------|----------|------------|
| AATF      | CCT8    | ERLIN1    | LIPG      | PC      | SAR1A    | TNFAIP8L2- |
| ABCD3     | CD44    | EXOSC4    | LOC440925 | PCDHGC4 | SDCCAG3  | SCNM1      |
| ABCF3     | CENPB   | FAIM      | LPAR6     | PDE3B   | SFXN2    | TNFRSF11B  |
| ABCG2     | CLPB    | FAM13A    | LRFN5     | PGGT1B  | SKA1     | TOE1       |
| ACAT1     | CMKLR1  | FAM181B   | LRRC55    | PHAX    | SLC25A12 | TOMM34     |
| ADAMTS15  | CNPY2   | FAM24B    | LRRTM1    | PHLDA2  | SLC26A2  | TOPBP1     |
| AGPAT5    | CNPY3   | FDX1L     | LSG1      | PIP4K2B | SLC35E1  | TOR1B      |
| ALDH1A2   | CNST    | FEN1      | MAD2L1    | PITHD1  | SLC35G1  | TPRKB      |
| ALG2      | COMMD9  | FRMD8     | MAD2L1BP  | PNO1    | SLIT2    | TRAF2      |
| AP1AR     | CRABP2  | GABBR1    | MAFA      | POLR2B  | SNAI1    | TRMU       |
| APEX1     | CWF19L1 | GLMN      | MAP2K2    | POLR2D  | SNAI2    | TRPM7      |
| APLNR     | CYBASC3 | GLRX3     | MCM8      | POLR2J  | SOD1     | TRUB2      |
| ATOH8     | DCBLD1  | GOSR2     | MCOLN3    | PRADC1  | SP5      | UBE2L3     |
| ATP5F1    | DDI2    | GRINL1A   | MDFIC     | PRKAG1  | SP6      | UFD1L      |
| BAG1      | DDX19A  | GRPEL1    | MESP2     | PRPF4   | SPATA5L1 | UNC5C      |
| BAZ1A     | DENR    | GTF2H1    | MINPP1    | PRPF6   | SPC25    | USP33      |
| BGN       | DGCR2   | GTF3A     | MKI67IP   | PSMD6   | SSBP1    | USP5       |
| BTBD1     | DHX34   | GYPC      | MPHOSPH10 | PSMD7   | STOML2   | UTP18      |
| BZW1      | DIS3    | HAT1      | MSX1      | PTDSS2  | STRAP    | WDR55      |
| C14orf169 | DIS3L   | HMGB1     | MTA2      | QTRTD1  | SUB1     | WDR81      |
| C16orf53  | DKK1    | HMX1      | MTRR      | RAB35   | TACR1    | WNT5A      |
| C1orf151  | DLL3    | HNRNPA1   | NBN       | RARS    | TAF12    | YBX1       |
| C1orf174  | DNAJA1  | HOXB2     | NCBP2     | RASL10B | TAF9     | ZBTB2      |
| C1orf52   | DNAJC25 | IRX2      | NDST1     | RASSF9  | TAOK2    | ZDHHC6     |
| C3orf14   | DNAJC7  | IRX5      | NDUFS1    | RBP1    | TCEB3    | ZFP64      |
| C5orf43   | DONSON  | ISCA1     | NHEJ1     | RCC1    | TDG      | ZMPSTE24   |
| C6orf204  | DRG2    | ISLR      | NOL8      | RFC2    | TENC1    | ZNF100     |
| C7orf16   | EEF1B2  | ISY1      | NTS       | RHOBTB2 | TFAM     | ZNF17      |
| CAND1     | EGFLAM  | JOSD2     | NUBP1     | RHOQ    | THEM4    | ZNF200     |
| CANX      | EID1    | KAZN      | NUP50     | RNF20   | THOC1    | ZNF286A    |
| CAPRIN2   | EIF1AD  | KCNK17    | OBFC2B    | RPSA    | THOC5    | ZNF347     |
| CCDC99    | EIF2B1  | KHDRBS3   | OLFM1     | RRAGA   | TIMM17A  | ZNF45      |
| CCNE2     | EMILIN1 | KIAA0226L | OLFML3    | SAC3D1  | TM2D2    | ZNF511     |
| CCNF      | EMP2    | KIAA1429  | PANK1     | SALL1   | TMEM70   | ZNF639     |
| CCT6A     | ENOX2   | LEF1      | PANX1     | SAMD1   | TNFAIP2  | ZNF668     |

**Supplementary file 1B: 140 MP genes**

|          |          |          |          |         |         |          |
|----------|----------|----------|----------|---------|---------|----------|
| ACTA1    | C12orf23 | DYNC111  | HHIPL2   | LRRN4   | PGM3    | SVEP1    |
| ACTC1    | C12orf35 | ECE1     | HS3ST3A1 | MAB21L2 | PGM5    | TANC1    |
| ADA      | C6orf138 | EMILIN2  | HSDL2    | MAGEB3  | PHLDA3  | TFPI     |
| ADAM12   | C9orf21  | FAM123C  | HSPA1B   | MALT1   | PLCB1   | TMED7    |
| ADAMTS12 | CALU     | FAM78A   | HTRA1    | MMP2    | PLEC    | TMEM107  |
| AEBP1    | CBLN2    | FBN2     | IFI16    | MOGS    | PMP22   | TMEM185A |
| ALPK2    | CCNB1IP1 | FMOD     | IL11     | MPST    | PPP1R2  | TMF1     |
| AMN1     | CHIC2    | FN1      | IL6      | MSX2    | PSTPIP2 | TNFAIP3  |
| AMOTL1   | CHST11   | FOXC2    | ISL1     | MYL4    | PXDN    | TNFRSF19 |
| AP3S1    | CLSTN2   | FSHR     | ITGA8    | MYLK3   | RASGRP1 | TNNT1    |
| ARSK     | CNOT2    | GNG11    | ITGA9    | NFATC1  | RASGRP3 | TPK1     |
| ART5     | COL1A2   | GOLIM4   | JPH2     | NKX3-1  | RGS4    | TTC9C    |
| ATP8B3   | CREG1    | GRAP2    | KDELC1   | NPPA    | RIPPLY1 | TWIST1   |
| B2M      | CRELD2   | GREM1    | KIAA1462 | NRP1    | SCGB1A1 | VPS29    |
| BAMBI    | CTNNA1   | GSN      | KIF26B   | PAPPA   | SCYL1   | VSTM2L   |
| BIN1     | DDB1     | GYPB     | KLK6     | PCSK2   | SEMA3G  | WDR20    |
| BMP4     | DGKI     | GYPE     | KLK7     | PCYOX1  | SESN1   | YIPF5    |
| BMP5     | DNAJC14  | HAPLN1   | LAMC1    | PDGFRA  | SFRP5   | ZAP70    |
| BMPER    | DOK4     | HAS2-AS1 | LNPEP    | PDGFRB  | SPSB1   | ZNF611   |
| BSG      | DVL1     | HCN1     | LRRC32   | PGF     | SRP54   | ZNF702P  |
